# Both 25-Hydroxyvitamin-D<sub>3</sub> and 1,25-Dihydroxyvitamin-D<sub>3</sub> Reduces Inflammatory Response in Human Periodontal Ligament Cells

Oleh Andrukhov<sup>1\*</sup>, Olena Andrukhova<sup>2</sup>, Ulanemekh Hulan<sup>1,3</sup>, Yan Tang<sup>1,4</sup>, Hans-Peter Bantleon<sup>5</sup>, Xiaohui Rausch-Fan<sup>1,5\*</sup>

**1** Division of Oral Biology, Bernhard Gottlieb School of Dentistry, Medical University of Vienna, Vienna, Austria, **2** Department of Biomedical Science, University of Veterinary Medicine, Vienna, Austria, **3** Department of Restorative Science, School of Dentistry, Health Science University of Mongolia, Ulan Bator, Mongolia, **4** Department of Stomatology, Xuanwu Hospital, Capital Medical University, Beijing, China, **5** Division of Orthodontics, Bernhard Gottlieb School of Dentistry, Medical University of Vienna, Vienna, Austria

## Abstract

Periodontitis is an inflammatory disease leading to the destruction of periodontal tissue. Vitamin D<sub>3</sub> is an important hormone involved in the preservation of serum calcium and phosphate levels, regulation of bone metabolism and inflammatory response. Recent studies suggest that vitamin D<sub>3</sub> metabolism might play a role in the progression of periodontitis. The aim of the present study was to examine the effects of 25(OH)D<sub>3</sub>, which is stable form of vitamin D<sub>3</sub> in blood, and biologically active form 1,25(OH)<sub>2</sub>D<sub>3</sub> on the production of interleukin-6 (IL-6), interleukin-8 (IL-8), and monocyte chemoattractant protein-1 (MCP-1) by cells of periodontal ligament. Commercially available human periodontal ligament fibroblasts (hPDLF) and primary human periodontal ligament cells (hPDL) were used. Cells were stimulated with either *Porphyromonas gingivalis* lipopolysaccharide (LPS) or heat-killed *P. gingivalis* in the presence or in the absence of 25(OH)D<sub>3</sub> or 1,25(OH)<sub>2</sub>D<sub>3</sub> at concentrations of 10–100 nM. Stimulation of cells with either *P. gingivalis* LPS or heat-killed *P. gingivalis* resulted in a significant increase of the expression levels of IL-6, IL-8, and MCP-1 in gene as well as in protein levels, measured by qPCR and ELISA, respectively. The production of these pro-inflammatory mediators in hPDLF was significantly inhibited by both 25(OH)D<sub>3</sub> and 1,25(OH)<sub>2</sub>D<sub>3</sub> in a dose-dependent manner. In primary hPDLs, both 25(OH)D<sub>3</sub> and 1,25(OH)<sub>2</sub>D<sub>3</sub> inhibited the production of IL-8 and MCP-1 but have no significant effect on the IL-6 production. The effect of both 25(OH)D<sub>3</sub> and 1,25(OH)<sub>2</sub>D<sub>3</sub> was abolished by specific knockdown of vitamin D<sub>3</sub> receptor by siRNA. Our data suggest that vitamin D<sub>3</sub> might play an important role in the modulation of periodontal inflammation via regulation of cytokine production by cells of periodontal ligament. Further studies are required for better understanding of the extents of this anti-inflammatory effect and its involvement in the progression of periodontal disease.

**Citation:** Andrukhov O, Andrukhova O, Hulan U, Tang Y, Bantleon H-P, et al. (2014) Both 25-Hydroxyvitamin-D<sub>3</sub> and 1,25-Dihydroxyvitamin-D<sub>3</sub> Reduces Inflammatory Response in Human Periodontal Ligament Cells. PLoS ONE 9(2): e90301. doi:10.1371/journal.pone.0090301

**Editor:** Makoto Makishima, Nihon University School of Medicine, Japan

**Received:** October 9, 2013; **Accepted:** January 31, 2014; **Published:** February 28, 2014

**Copyright:** © 2014 Andrukhov et al. This is an open-access article distributed under the terms of the Creative Commons Attribution License, which permits unrestricted use, distribution, and reproduction in any medium, provided the original author and source are credited.

**Funding:** The study was supported by authors' institution (Bernhard Gottlieb School of Dentistry, Medical University of Vienna) and by International Team of Implantology Foundation (Project No. 781\_2011). The funders had no role in study design, data collection and analysis, decision to publish or preparation of the manuscript.

**Competing Interests:** The authors have declared that no competing interests exist.

\* E-mail: oleh.andrukhov@meduniwien.ac.at (OA); xiaohui.rausch-fan@meduniwien.ac.at (XR-F)

## Introduction

Vitamin D<sub>3</sub> is known to play an important role in the bone metabolism and mineral homeostasis [1]. The major sources of vitamin D<sub>3</sub> in organism are production by skin on the sun exposure and dietary supplements. To become metabolically active, vitamin D<sub>3</sub> is first converted by liver to 25(OH)D<sub>3</sub> (calcifediol), which has a half life time of about 15 day [2]. Calcifediol could be further converted into the active form of vitamin D<sub>3</sub> calcitriol (1,25(OH)<sub>2</sub>D<sub>3</sub>) by specific enzyme 25(OH)D-1 $\alpha$ -hydroxylase. The half life time of 1,25(OH)<sub>2</sub>D<sub>3</sub> is about 15 h [2] and its biological effects are mediated by activation of the vitamin D<sub>3</sub> receptor (VDR), a member of the nuclear receptor superfamily [3]. For a long time it was thought that the expression of 1 $\alpha$ -hydroxylase is limited to kidney, but now this enzyme is also found to be expressed in numerous extrarenal tissues [4]. There

are accumulating evidences that vitamin D<sub>3</sub> is also involved in the regulation of immune response [5].

Periodontitis is a chronic bacterial infectious disease that affects tooth supporting tissues of periodontium [6,7]. Periodontitis is caused by overgrowth of some anaerobic Gram-negative bacteria, which trigger host responses causing most of the tissue damages, and might lead to substantial loss of alveolar bone and eventually the loss of teeth [8]. Especially “red complex bacteria” that include the periodontal pathogens *Porphyromonas gingivalis*, *Treponema denticola*, and *Tannerella forsythia* have been strongly associated with clinical measurements of periodontitis [9]. The association between vitamin D<sub>3</sub> and periodontitis is currently under investigation and its role in the progression of periodontitis is not entirely understood [10]. Some studies report decreased serum levels of vitamin D<sub>3</sub> in periodontitis as well as a negative correlation between serum vitamin D<sub>3</sub> levels and severity of periodontal inflammation [11,12]. In contrast, other studies show the

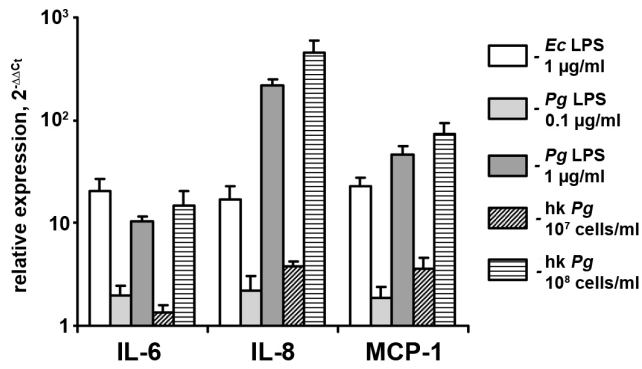

**Figure 1. Gene expression levels of pro-inflammatory mediators in hPDLF in response to stimulation with *E. coli* LPS, *P. gingivalis* LPS, and heat-killed *P. gingivalis*.** Cells were stimulated with *E. coli* LPS (1  $\mu\text{g/ml}$ ), *P. gingivalis* LPS (0.1–1  $\mu\text{g/ml}$ ), or heat-killed *P. gingivalis* ( $10^7$ – $10^8$  cells/ml) for 24 h. Gene expression levels of IL-6 (A), IL-8 (B), and MCP-1 (C) were measured using q-PCR. Y-axes represent the n-fold expression levels of target gene in relation to non-stimulated cells (control).  
doi:10.1371/journal.pone.0090301.g001

increased serum levels of vitamin D<sub>3</sub> in patients with aggressive periodontitis and positive association between serum vitamin D<sub>3</sub> concentration and periodontal disease severity [13,14]. Thus, the role of vitamin D<sub>3</sub> in periodontal disease needs to be further investigated.

Periodontal ligament is a structure connecting teeth to the alveolar bone and seems to actively participate in alveolar bone remodelling [15]. Periodontal ligament cells (PDLs) are fibroblast-like cells characterized by collagen production but also possessing some osteoblastic features (for review, see [16]). In addition, periodontal ligament cells produce several pro-inflammatory mediators when stimulated with *Porphyromonas gingivalis* and/or its components [16,17,18]. Periodontal ligament cells isolated from *P. gingivalis*-positive periodontitis patients exhibit increased cytokine production in response to *P. gingivalis* [19]. Due to the proximity of periodontal ligament to alveolar bone, the cytokine production by periodontal ligament cells might influence the processes of bone resorption in periodontal disease. Vitamin D<sub>3</sub> might have an important role in the function of periodontal ligament in periodontal disease, because periodontal ligament cells express 1 $\alpha$ -hydroxylase and convert 25(OH)D<sub>3</sub> into 1,25(OH)<sub>2</sub>D<sub>3</sub> [20,21]. A recent study shows that 1,25(OH)<sub>2</sub>D<sub>3</sub> inhibits production of

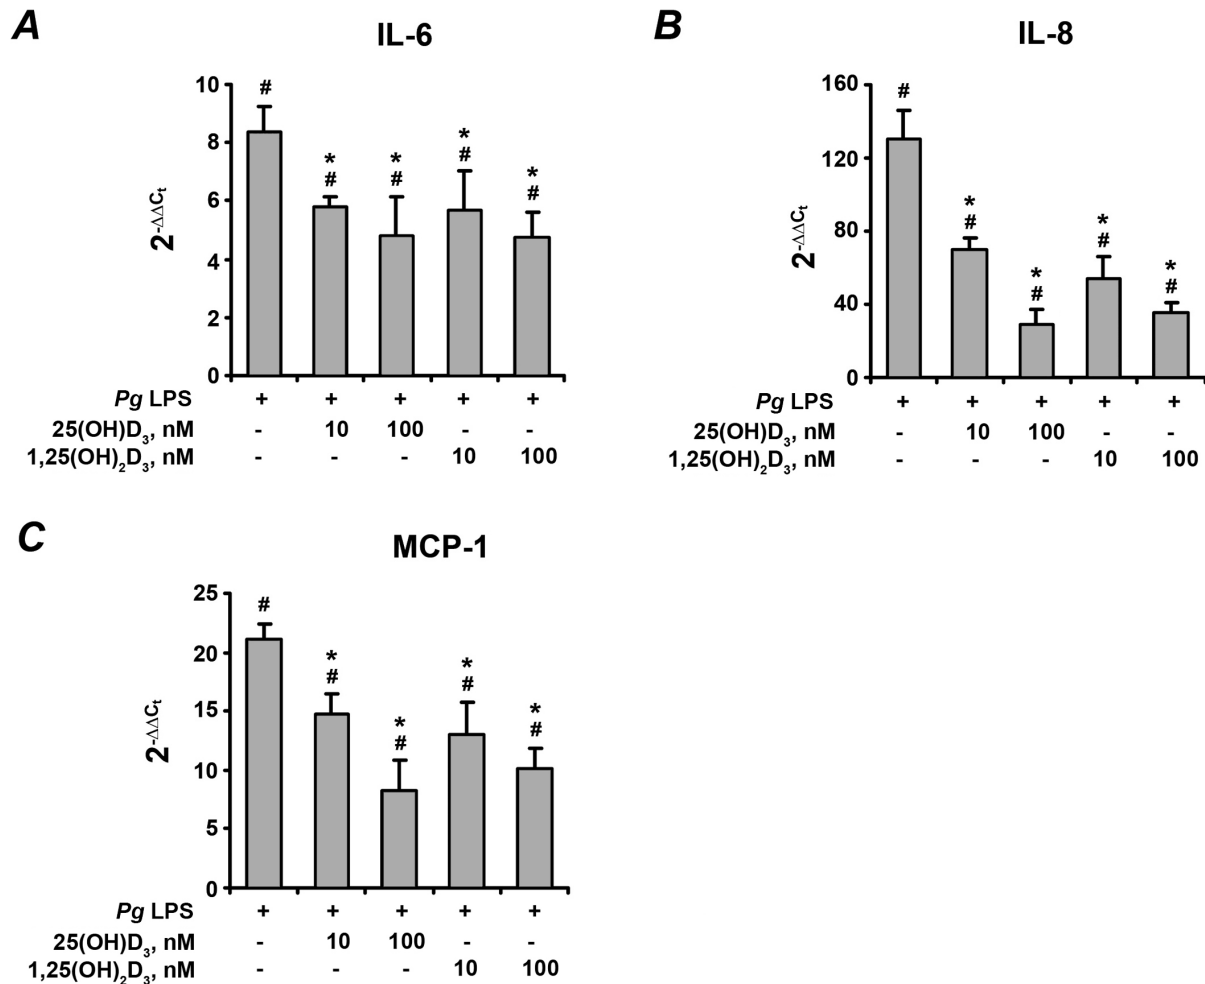

**Figure 2. Effect of 25(OH)D<sub>3</sub> and 1,25(OH)<sub>2</sub>D<sub>3</sub> on the gene-expression levels of pro-inflammatory mediators in hPDLF in response to stimulation with *P. gingivalis* LPS.** Cells were stimulated with *P. gingivalis* LPS (*Pg* LPS, 1  $\mu\text{g/ml}$ ) for 24 h in the presence or in the absence of different concentrations of 25(OH)D<sub>3</sub> or 1,25(OH)<sub>2</sub>D<sub>3</sub>. Gene expression levels of IL-6 (A), IL-8 (B), and MCP-1 (C) were measured using q-PCR. Y-axes represent the n-fold expression levels of target gene in relation to non-stimulated cells (control). # means significantly different from control group ( $2^{-\Delta\Delta C_t} = 1$ ). \* means significantly different from cells stimulated with *P. gingivalis* LPS only.  
doi:10.1371/journal.pone.0090301.g002

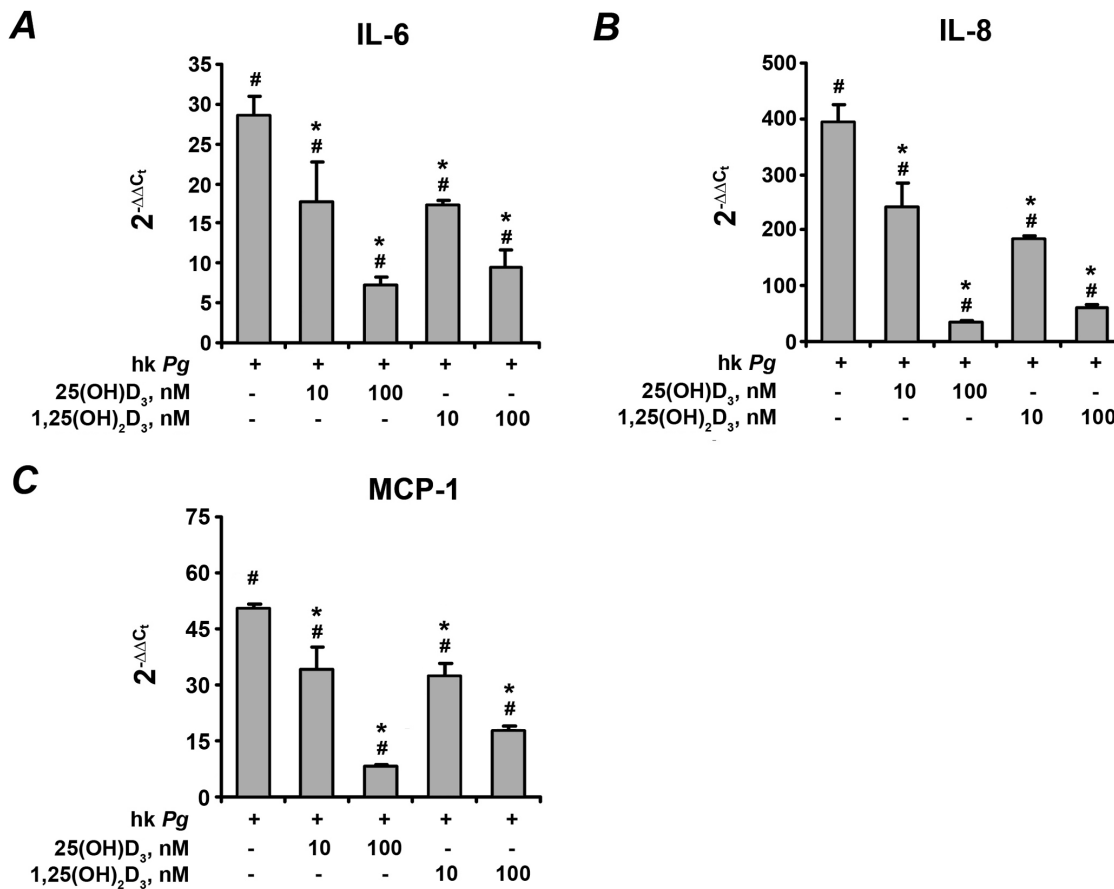

**Figure 3. Effect of 25(OH)D<sub>3</sub> and 1,25(OH)<sub>2</sub>D<sub>3</sub> on the gene-expression levels of pro-inflammatory mediators in hPdLF in response to stimulation with heat-killed *P. gingivalis*.** Cells were stimulated with heat-killed *P. gingivalis* (hk Pg, 10<sup>8</sup> cells/ml) for 24 h in the presence or in the absence of different concentrations of 25(OH)D<sub>3</sub> or 1,25(OH)<sub>2</sub>D<sub>3</sub>. Gene expression levels of IL-6 (A), IL-8 (B), and MCP-1 (C) were measured using q-PCR. Y-axes represent the n-fold expression levels of target gene in relation to non-stimulated cells (control). # means significantly different from control group (2<sup>-ΔΔCt</sup> = 1). \* means significantly different from cells stimulated with heat-killed *P. gingivalis* only. doi:10.1371/journal.pone.0090301.g003

interleukin-8 by primary human periodontal ligament cells but has no effect on production of IL-6 [22]. Yet, it is not known if 25(OH)D<sub>3</sub>, which is a biological precursor of 1,25(OH)<sub>2</sub>D<sub>3</sub> and main form of vitamin D<sub>3</sub> in blood, could also influence the inflammatory response in cells of human periodontal ligament.

The main aim of the present study was to investigate if 25(OH)D<sub>3</sub> as well as 1,25(OH)<sub>2</sub>D<sub>3</sub> influence the production of pro-inflammatory mediators in cells of human periodontal ligament in response to stimulation with periodontal pathogens. To answer this question we investigated the effect of 25(OH)D<sub>3</sub> and 1,25(OH)<sub>2</sub>D<sub>3</sub> on the production of interleukin-6 (IL-6), interleukin-8 (IL-8), and monocyte chemoattractant protein 1 (MCP-1) by cells of human periodontal ligament in response to stimulation with *P. gingivalis* LPS or heat-killed *P. gingivalis*. The contribution of VDR on the effect of both vitamin D<sub>3</sub> forms was investigated in the experiments with deletion of this protein using small interfering RNA (siRNA).

In the present study, we use commercially available primary human periodontal ligament fibroblasts (hPdLF), which represent standardized model of periodontal ligament cells. In addition, the effect of both vitamin D<sub>3</sub> forms was investigated on the primary human periodontal ligament cells (hPdLC) isolated from six different donors. Our results revealed that both 25(OH)D<sub>3</sub> and

1,25(OH)<sub>2</sub>D<sub>3</sub> might modulate periodontal inflammation via regulation of cytokine production by cells of periodontal ligament.

## Materials And Methods

### Ethic Statement

Protocol for primary human periodontal ligament cells isolation was approved by the Ethics Committee of the Medical University of Vienna. Patients were informed in details before the surgical procedures and gave their written agreement.

### Cell Culture and reagents

Primary commercially available Clonetics human periodontal ligament fibroblasts (hPdLF) isolated from 16-year old male (Lonza, Switzerland) were used in the present study. These cells were shown to produce pro-inflammatory mediators and express osteogenesis-related genes, which is characteristic for periodontal ligament cells [23,24,25]. In addition, primary human periodontal ligament cells (hPdLC) were isolated from periodontally healthy donors undergoing routine extraction of their third molar teeth by outgrowth method [26]. hPdLC were isolated by scraping the ligament tissue from the teeth root surface and cultured in Dulbecco's modified Eagle's medium (DMEM), supplemented with 10% fetal bovine serum (FBS), streptomycin (50 μg/ml) and

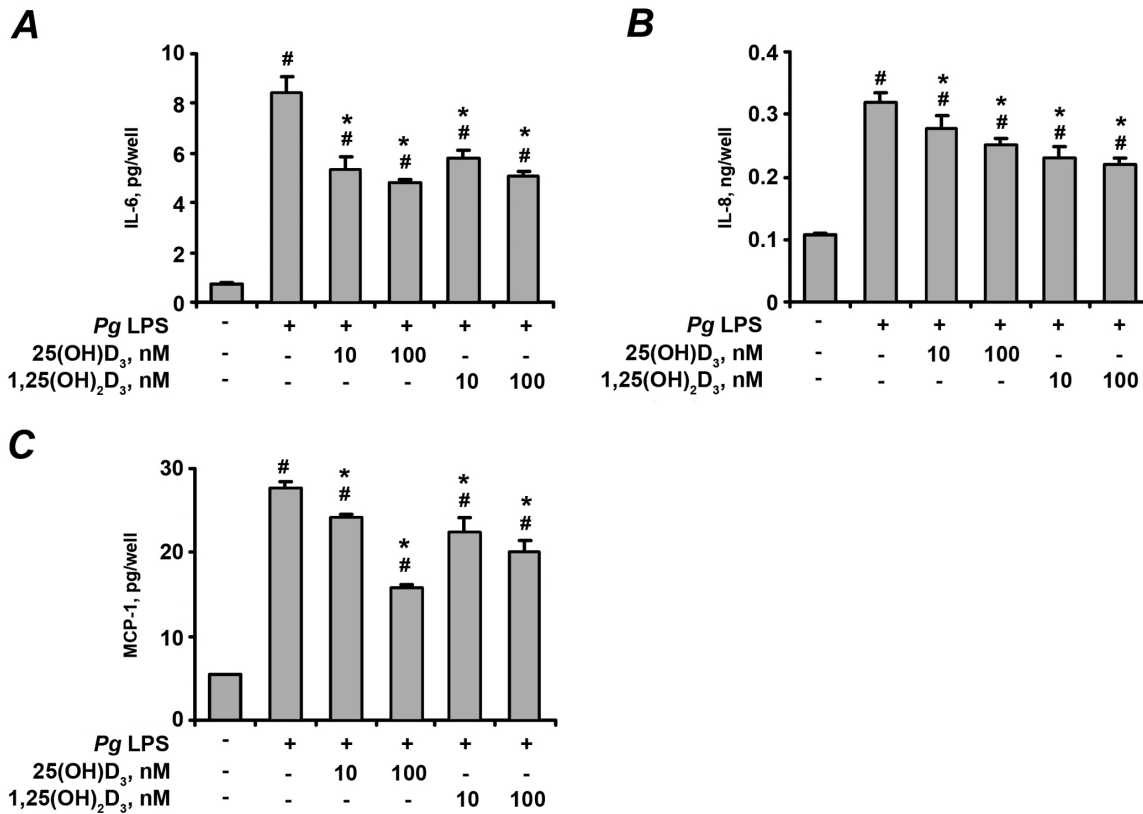

**Figure 4. Effect of 25(OH)D<sub>3</sub> and 1,25(OH)<sub>2</sub>D<sub>3</sub> on the production of pro-inflammatory mediators by hPDLF in response to stimulation with *P. gingivalis* LPS.** Cells were stimulated with *P. gingivalis* LPS (Pg LPS, 1 µg/ml) for 24 h in the presence or in the absence of different concentrations of 25(OH)D<sub>3</sub> or 1,25(OH)<sub>2</sub>D<sub>3</sub>. The levels of IL-6 (A), IL-8 (B), and MCP-1 (C) were measured in cell supernatants using ELISA. # means significantly different from control group (non stimulated cells). \* means significantly different from group stimulated with *P.gingivalis* LPS only doi:10.1371/journal.pone.0090301.g004

penicillin (100 U/ml) under humidified air atmosphere of 5% CO<sub>2</sub> at 37°C. Cells were cultured in Dulbecco's modified Eagle's medium (DMEM; Invitrogen), supplemented with 10% of FBS, 100 U/mL penicillin, and 100 µg/mL streptomycin at 37°C in a humidified atmosphere containing 5% CO<sub>2</sub>. Cells from passage levels 3–6 were used in this study.

Commercially available ultrapure *P. gingivalis* LPS, heat-killed *P. gingivalis*, and ultrapure *E. coli* LPS (all from Invivogen, San Diego, USA) were used in the present study. As reported by other study [27], LPS preparations are free from contaminating lipoproteins.

#### Cells stimulation

Cells were seeded in a 24-well plate at a density of  $5 \times 10^4$  cells per well containing 0.5 mL of DMEM medium supplemented with 10% FBS. After 24 h, cells were stimulated with either *P. gingivalis* LPS (1 µg/ml) or heat-killed *P. gingivalis* ( $10^8$  cells/ml) in DMEM supplemented with 2% FBS. Stimulation was performed either in the presence or in the absence of 25(OH)D<sub>3</sub> (10–100 nM, Cayman Chemicals, Ann Arbor, USA) or 1,25(OH)<sub>2</sub>D<sub>3</sub> (10–100 nM, Sigma, San Diego, USA). Each experimental group included three wells. After stimulation for 24 h, the cellular mRNA expression levels of IL-6, IL-8 and MCP-1 in cells as well as the content of corresponding proteins in the conditioned media were determined.

#### Quantitative PCR

The mRNA expression levels of IL-6, IL-8, and MCP-1 were determined by qPCR as described previously [28,29], taking the

β-actin encoding gene as internal reference. Isolation of mRNA and transcription into cDNA was performed using the TaqMan Gene Expression Cells-to-CT kit (Ambion/Applied Biosystems, Foster City, CA, USA) according to the manufacturer's instructions. This kit provides good accuracy and superior sensitivity of gene-expression analysis [30]. qPCR was performed on an ABI StepOnePlus device (Applied Biosystems) in paired reactions using the Taqman gene expression assays with following ID numbers (all from Applied Biosystems): IL-6, Hs00985639\_m1; IL-8, Hs00174103\_m1; MCP-1, Hs00234140\_m1; β-actin, Hs99999903\_m1. qPCR reactions were performed in triplicate in 96-well plates using the following thermocycling conditions: 95°C for 10 min; 40 cycles, each for 15 s at 95°C and at 60°C for 1 min. The point at which the PCR product was first detected above a fixed threshold (cycle threshold, C<sub>t</sub>), was determined for each sample. Changes in the expression of target genes were calculated using the  $2^{-\Delta\Delta C_t}$  method, where  $\Delta\Delta C_t = (C_t^{\text{target}} - C_t^{\beta\text{-actin}})_{\text{sample}} - (C_t^{\text{target}} - C_t^{\beta\text{-actin}})_{\text{control}}$ , taking an untreated sample as a control.

#### Measurements of cytokines in supernatants

Commercially available ELISA kits (Hoelzel Diagnostika, Cologne, Germany) were used for measurements of IL-6, IL-8, and MCP-1 levels in the conditioned media. For measurement of IL-6 and MCP-1 samples were not diluted, whereas for measurements of IL-8 samples were diluted 1:10.

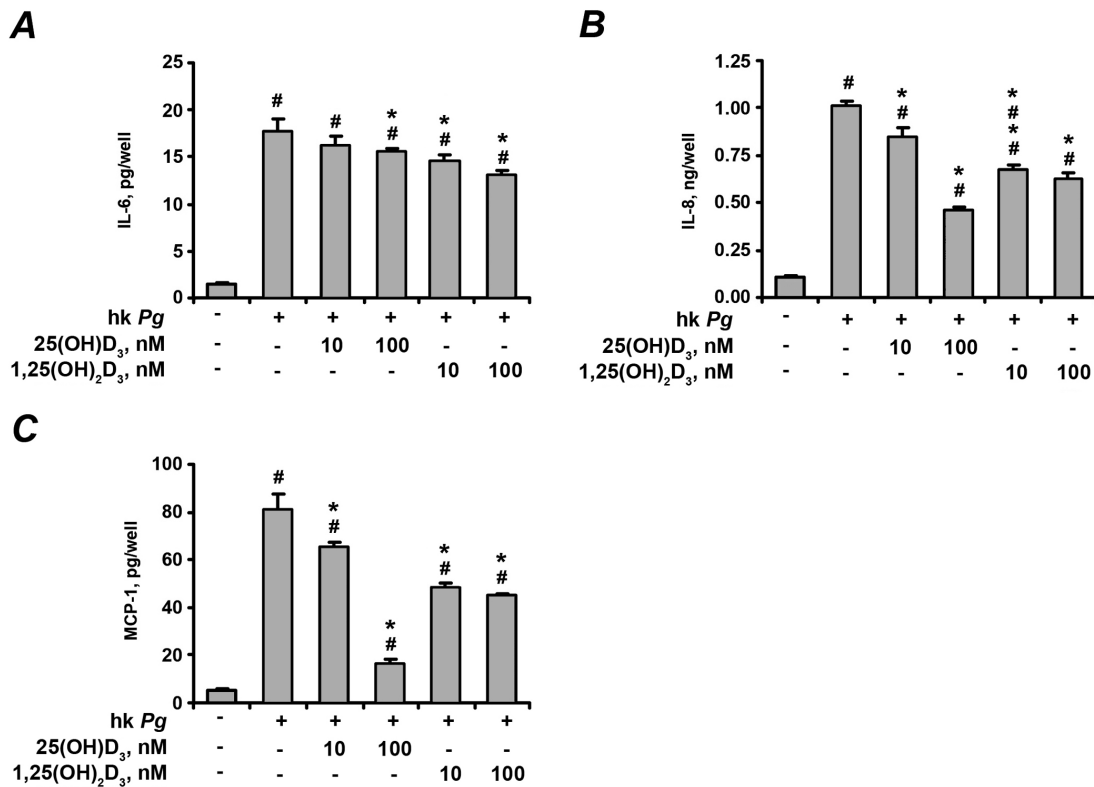

**Figure 5. Effect of 25(OH)D<sub>3</sub> and 1,25(OH)<sub>2</sub>D<sub>3</sub> on the production of pro-inflammatory mediators by hPdLF in response to stimulation with heat-killed *P. gingivalis*.** Cells were stimulated with heat-killed *P. gingivalis* (hk Pg, 10<sup>8</sup> cells/ml) for 24 h in the presence or in the absence of different concentrations of 25(OH)D<sub>3</sub> or 1,25(OH)<sub>2</sub>D<sub>3</sub>. The levels of IL-6 (A), IL-8 (B), and MCP-1 (C) were measured in cell supernatants using ELISA. # means significantly different from control group (non-stimulated cells). \* means significantly different from group stimulated with heat-killed *P. gingivalis* only  
doi:10.1371/journal.pone.0090301.g005

#### RNA Interference of VDR

The highly specific technique of small interfering RNA (siRNA) was used to knockdown the expression of VDR in hPdLF. Cells were seeded at a density of  $3 \times 10^4$  cells per well containing 0.5 mL of DMEM medium supplemented with 10% FBS without antibiotics. 24 h later, the cells were transfected with either VDR siRNA (Cat. Nr. Sc-106692, Santa Cruz Biotechnology, Heidelberg, Germany) or a non-silencing control siRNA (Cat. Nr. Sc-37007, Santa Cruz Biotechnology) using siRNA Reagent System (Cat. Nr. Sc-45064, Santa Cruz Biotechnology) according to the manufacturers protocol. 48 h after transfection, cells were stimulated by *P. gingivalis* LPS or heat-killed *P. gingivalis* in the presence or in the absence of 25(OH)D<sub>3</sub> (100 nM) or 1,25(OH)<sub>2</sub>D<sub>3</sub> (100 nM). Stimulation was performed in DMEM containing 2% of FBS, 100 U/mL penicillin, and 100 µg/mL streptomycin. After 24 h, the gene expression levels of pro-inflammatory mediators IL-6, IL-8, and MCP-1 as well as the content of corresponding proteins in conditioned media were investigated. The effectivity of siRNA transfection was controlled by western blot. Protein samples were collected from cells, fractionated on SDS-PAGE and transferred to a nitrocellulose membrane. Immunoblots were incubated for 3 hours at room temperature with primary antibodies anti-VDR (Abcam) or anti-β-actin (Sigma). Then, membranes were incubated with anti-rabbit horseradish peroxidase-conjugated secondary antibodies (Amersham Life Sciences). Specific signal was visualized by ECL kit (Amersham Life Sciences). The protein bands (~48 kDa for VDR and ~42 kDa for β-actin, respectively) were quantified by Image Quant 5.0 software (Molecular Dynamics). Equal sample loading was

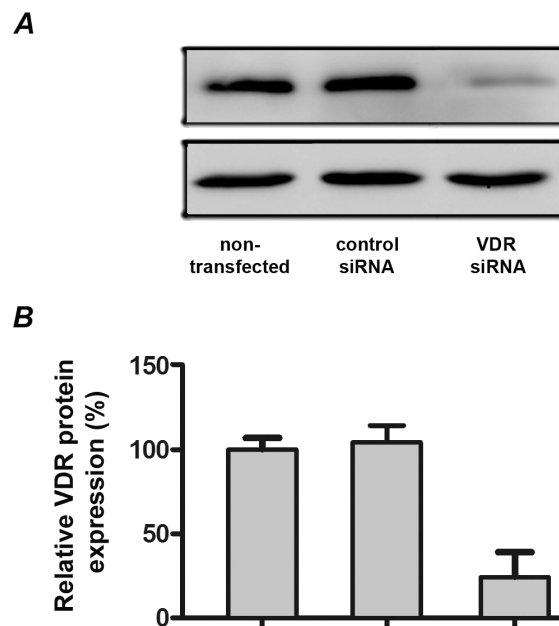

**Figure 6. Western blot of VDR in hPdLF after transfection with VDR siRNA.** (A) Original western-blots of hPdLF. Protein samples were collected from cells, and the expression of VDR and β-actin was detected using specific antibodies. (B) Quantification of western blot analysis. The protein bands of VDR and β-actin were quantified by Image Quant 5.0 software (Molecular Dynamics). The expression levels were normalized to β-actin.  
doi:10.1371/journal.pone.0090301.g006

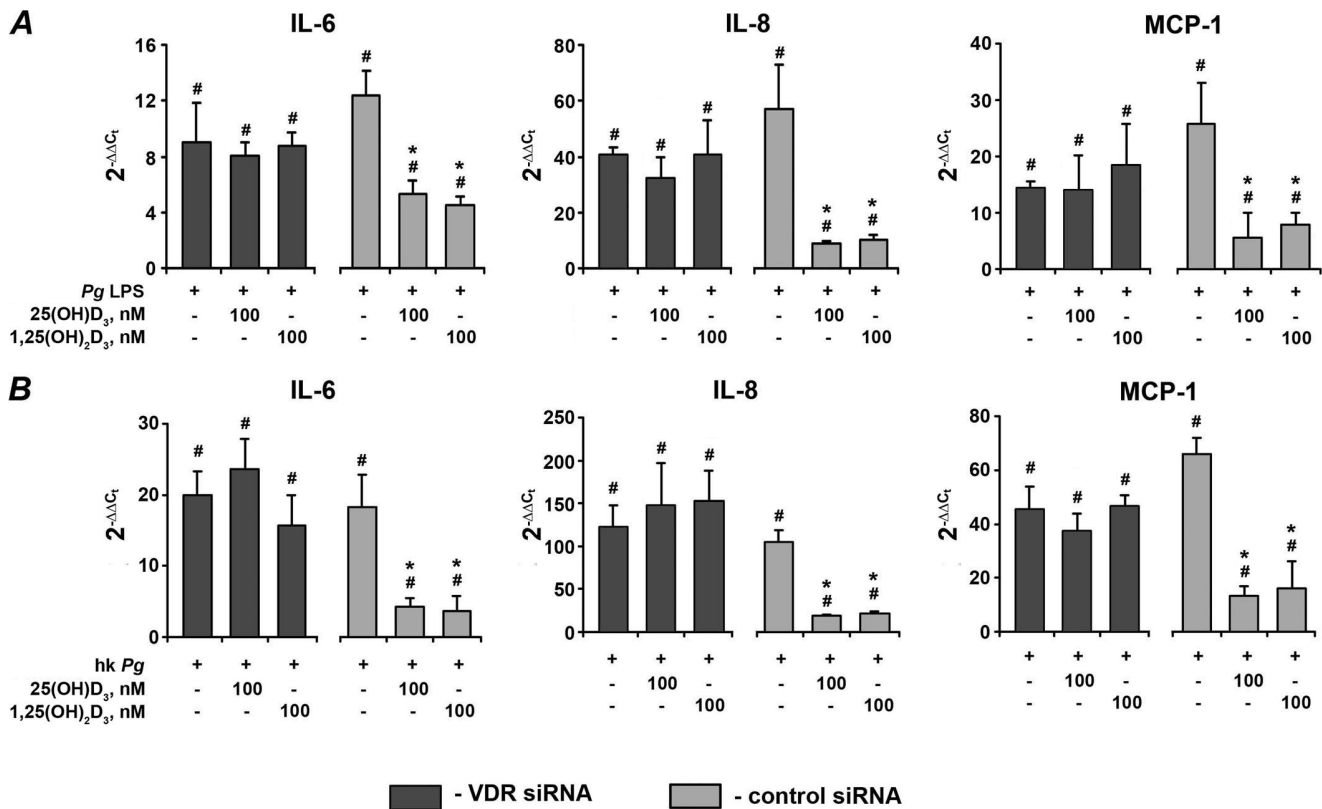

**Figure 7. Effect of 25(OH)D<sub>3</sub> and 1,25(OH)<sub>2</sub>D<sub>3</sub> on the gene-expression levels of pro-inflammatory mediators in hPdLF with silenced VDR in response to stimulation with *P. gingivalis* LPS or heat-killed *P. gingivalis*.** Gene expression levels of IL-6, IL-8, and MCP-1 were measured using q-PCR in hPdLF after transfection with either VDR siRNA or control siRNA and stimulation with *P. gingivalis* LPS (A, Pg LPS, 1 μg/ml) or heat-killed *P. gingivalis* (B, hk Pg, 10<sup>8</sup> cells/ml) in the presence or in the absence of 25(OH)D<sub>3</sub> or 1,25(OH)<sub>2</sub>D<sub>3</sub>. Y-axes represent the n-fold expression levels of target gene in relation to non-stimulated cells. # means significantly different from control group (2<sup>-ΔΔCt</sup> = 1). \* means significantly different from cells stimulated with heat-killed *P. gingivalis* LPS or heat-killed *P. gingivalis* only. doi:10.1371/journal.pone.0090301.g007

confirmed by Ponceau S staining of the Western blot [31]. The expression levels were normalized to β-actin.

### Statistical Analysis

The normal distribution of all data was tested with Kolmogorov-Smirnov test. After confirming normal distribution, the statistical differences between different groups were analysed by one-way analysis of variance (ANOVA) for repeated measures followed by t-test. All statistical analysis was performed using statistical program SPSS 19.0 (SPSS, Chicago, IL, USA). Data are expressed as mean ± S.E.M. Differences were considered to be statistically significant at p<0.05.

## Results

### Cytokine expression in hPdLF in response to stimulation with different concentrations of *P. gingivalis* LPS and heat-killed *P. gingivalis*

The response of hPdLF on the stimulation with different concentrations of *P. gingivalis* LPS (0.1–1 μg/ml) and heat-killed *P. gingivalis* (10<sup>7</sup>–10<sup>8</sup> cells/ml) in comparison with that of well known pathogen *E. coli* LPS (1 μg/ml) is shown on the Figure 1. Gene expression levels of IL-6, IL-8, and MCP-1 significantly increased after stimulation with all stimuli. The increase in the expression levels of pro-inflammatory mediators in response to stimulation with 1 μg/ml of *P. gingivalis* LPS or 10<sup>8</sup> cells/ml of heat-killed *P. gingivalis* was similar (IL-6) or markedly higher (IL-8, MCP-1) in

comparison with that to *E. coli* LPS. Therefore, these concentrations of *P. gingivalis* LPS and heat-killed *P. gingivalis* were used in our further experiments.

### Effect of vitamin D<sub>3</sub> on the gene expression of pro-inflammatory mediators in hPdLF

The effect of 25(OH)D<sub>3</sub> and 1,25(OH)<sub>2</sub>D<sub>3</sub> on the gene expression levels of pro-inflammatory mediators IL-6, IL-8, and MCP-1 in hPdLF in response to stimulation with *P. gingivalis* LPS and heat-killed *P. gingivalis* is shown on the Figures 2 and 3, respectively. In commercially available cells, the expression levels of all pro-inflammatory mediators were significantly increased in response to stimulation with either *P. gingivalis* LPS or heat-killed *P. gingivalis*. Both 25(OH)D<sub>3</sub> and 1,25(OH)<sub>2</sub>D<sub>3</sub> at concentrations of 10–100 nM induced a dose-dependent decrease in the *P. gingivalis* LPS- and heat-killed *P. gingivalis*-induced gene-expression levels of IL-6, IL-8, and MCP-1 (p<0.05).

### Effect of vitamin D<sub>3</sub> on cytokines production by hPdLF in vitro

The effect of 25(OH)D<sub>3</sub> and 1,25(OH)<sub>2</sub>D<sub>3</sub> on the protein content of IL-6, IL-8, and MCP-1 in conditioned media after stimulation of hPdLF cells with *P. gingivalis* LPS and heat-killed *P. gingivalis* is shown on the Figures 4 and 5, respectively. The soluble protein levels of these pro-inflammatory mediators in conditioned media were significantly increased after stimulation with either *P.*

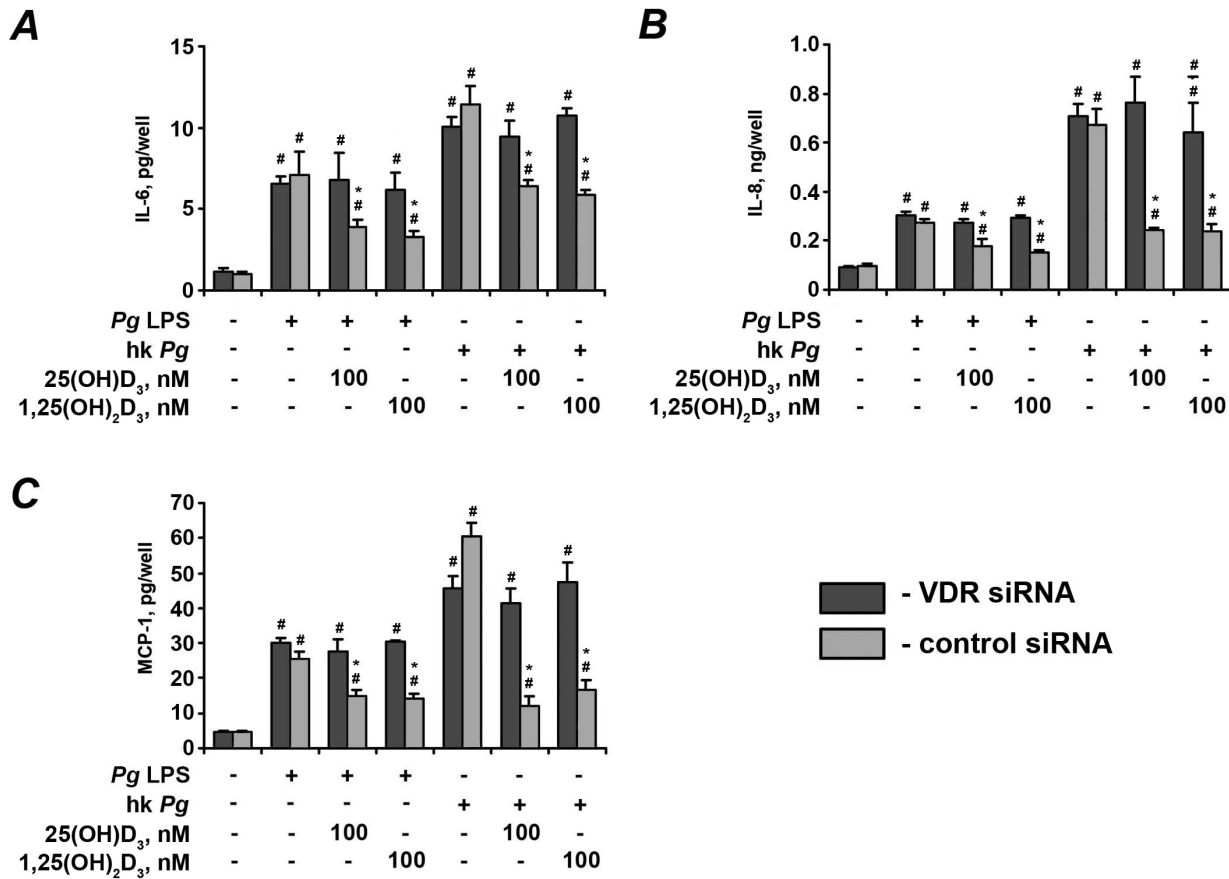

**Figure 8. Effect of 25(OH)D<sub>3</sub> and 1,25(OH)<sub>2</sub>D<sub>3</sub> on the production of pro-inflammatory mediators by hPdLF with silenced VDR.** Cells were transfected with either VDR siRNA or control siRNA and stimulated with *P. gingivalis* LPS (Pg LPS, 1 μg/ml) or heat-killed *P. gingivalis* (hk Pg, 10<sup>8</sup> cells/ml) for 24 h in the presence or in the absence of 25(OH)D<sub>3</sub> or 1,25(OH)<sub>2</sub>D<sub>3</sub>. # means significantly different from control group ( $2^{-\Delta\Delta C_t} = 1$ ). \* means significantly different from cells stimulated with either *P. gingivalis* LPS or heat-killed *P. gingivalis* only. doi:10.1371/journal.pone.0090301.g008

*gingivalis* LPS (Figure 4) or heat-killed *P. gingivalis* (Figure 5). 25(OH)D<sub>3</sub> and 1,25(OH)<sub>2</sub>D<sub>3</sub> at concentrations of 10–100 nM induced dose-dependent decrease in the *P. gingivalis* LPS- and heat-killed *P. gingivalis*-induced production of IL-6, IL-8, and MCP-1.

#### Effect of vitamin D<sub>3</sub> on expression of pro-inflammatory mediators in hPdLF transfected with either VDR siRNA or non-silencing control siRNA

Figure 5 shows the effect of expression of VDR protein in hPdLF after transfection with either VDR siRNA or control siRNA measured by Western blot. Transfection of hPdLF with VDR siRNA resulted in significant decrease of VDR protein expression. As measured by densitometry, transfected cells expressed about 20% of VDR protein compared to non-transfected cells. Transfection of hPdLF with control siRNA did not influence VDR expression. The effect of 25(OH)D<sub>3</sub> and 1,25(OH)<sub>2</sub>D<sub>3</sub> on the gene expression levels of pro-inflammatory mediators in response to stimulation with *P. gingivalis* LPS and heat-killed *P. gingivalis* in hPdLF transfected with VDR siRNA or control siRNA is shown on the Figures 6 and 7, respectively. The protein content of IL-6, IL-8, and MCP-1 in conditioned media is shown on the Figure 8. In hPdLF transfected with VDR siRNA neither 25(OH)D<sub>3</sub> nor 1,25(OH)<sub>2</sub>D<sub>3</sub> were able to diminish the response to *P. gingivalis* LPS or heat-killed *P. gingivalis*. This was true for both gene expression levels of IL-6, IL-8, and MCP-1 as well as for their content in conditioned media. In hPdLF transfected with

control siRNA, both 25(OH)D<sub>3</sub> and 1,25(OH)<sub>2</sub>D<sub>3</sub> diminished the production of pro-inflammatory mediators in response to stimulation with *P. gingivalis* LPS or heat-killed *P. gingivalis*.

#### Effect of vitamin D<sub>3</sub> on cytokines expression in primary hPdLC isolated from healthy individuals

The effect of 25(OH)D<sub>3</sub> and 1,25(OH)<sub>2</sub>D<sub>3</sub> on the gene expression levels of IL-6, IL-8, and MCP-1 in primary hPdLC after stimulation with *P. gingivalis* LPS and heat-killed *P. gingivalis* is shown on the Figure 9. The content of corresponding cytokines in the conditioned media is presented on the Figure 10. Similarly to hPdLF, in primary hPdLC, both 25(OH)D<sub>3</sub> and 1,25(OH)<sub>2</sub>D<sub>3</sub> induced a dose-dependent decrease in the *P. gingivalis* LPS- and heat-killed *P. gingivalis*-stimulated expression of IL-8 and MCP-1. Both forms of vitamin D<sub>3</sub> tended to diminish IL-6 production by primary hPdLC but in contrast to hPdLF this effect was not statistically significant.

#### Discussion

In the present study we investigated the effect of two different forms of vitamin D<sub>3</sub> 25(OH)D<sub>3</sub> and 1,25(OH)<sub>2</sub>D<sub>3</sub>, on the production of pro-inflammatory mediators by cells of human periodontal ligament in response to stimulation with *P. gingivalis* LPS or heat-killed *P. gingivalis*. We focused on the measurements of the expression of IL-6, IL-8, and MCP-1, which are produced by

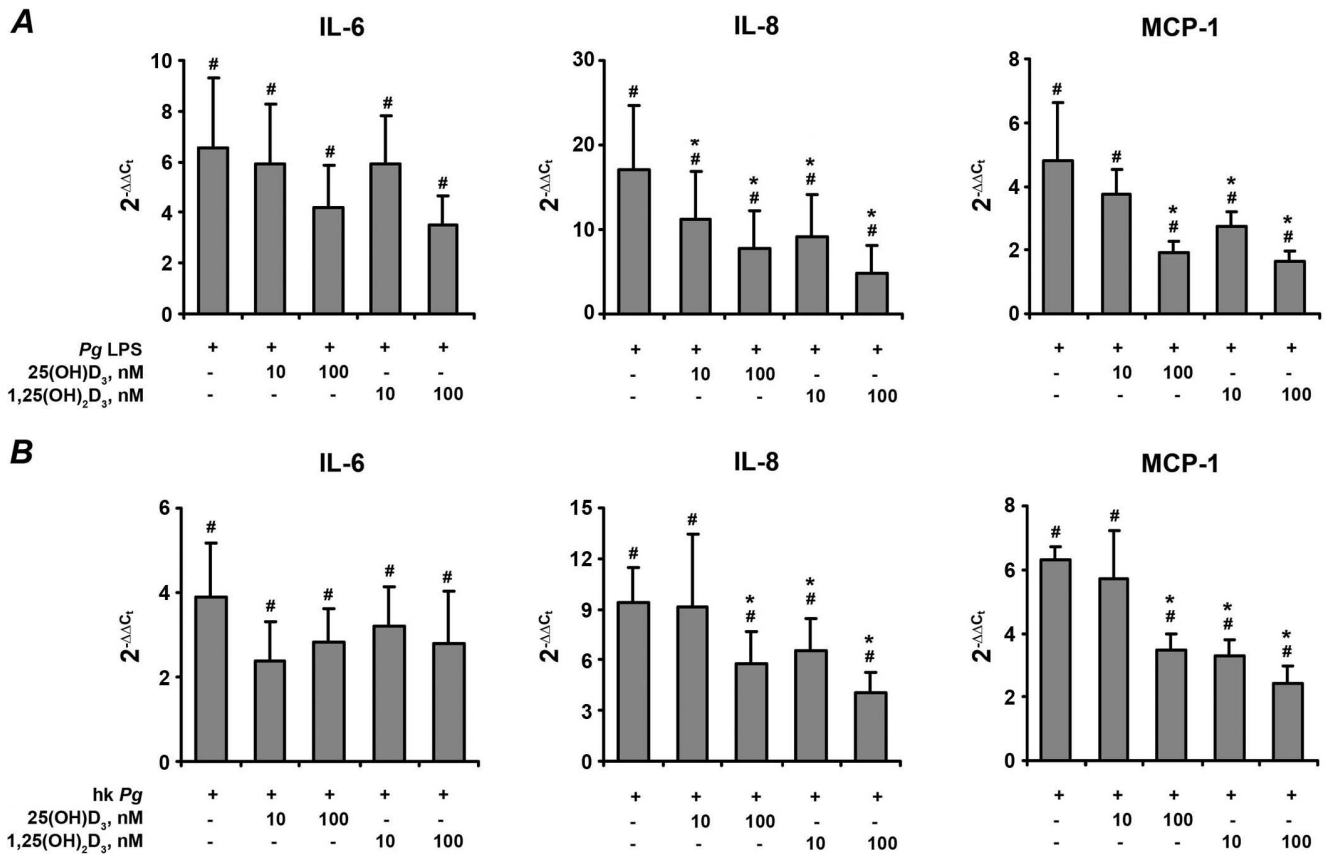

**Figure 9. Effect of 25(OH)D<sub>3</sub> and 1,25(OH)<sub>2</sub>D<sub>3</sub> on the gene-expression levels of pro-inflammatory mediators in primary hPDL in response to stimulation with *P. gingivalis* LPS or heat-killed *P. gingivalis*.** Cells were stimulated with *P. gingivalis* LPS (*Pg* LPS, 1 μg/ml) or heat-killed *P. gingivalis* (*hk Pg*, 10<sup>8</sup> cells/ml) for 24 h in the presence or in the absence of different concentrations of 25(OH)D<sub>3</sub> or 1,25(OH)<sub>2</sub>D<sub>3</sub>. Gene expression levels of IL-6 (A), IL-8 (B), and MCP-1 (C) were measured using q-PCR. Y-axes represent the n-fold expression levels of target gene in relation to non-stimulated cells (control). Data are presented as mean ± SEM of six different donors. # means significantly different from control group (2<sup>-ΔΔCt</sup> = 1). \* means significantly different from cells stimulated with *P. gingivalis* LPS or heat-killed *P. gingivalis* only.  
doi:10.1371/journal.pone.0090301.g009

periodontal ligament cells and are thought to play an important role in the progression of periodontal disease. IL-6 is a pro-inflammatory cytokine, which plays a key role in acute inflammation phase and promotes bone resorption [32,33]. IL-8 and MCP-1 are chemoattractant, which induce migration of neutrophils and monocytes, respectively, to the inflammation site and promote the development of acute inflammation [34,35].

The main observation of the present study is that the production of pro-inflammatory cytokines by cells of periodontal ligament is inhibited by 25(OH)D<sub>3</sub>, which is the main form of vitamin D<sub>3</sub> circulating in the blood and is commonly used for determination of vitamin D<sub>3</sub> status. The effect of 25(OH)D<sub>3</sub> was qualitatively similar to that of biologically active 1,25(OH)<sub>2</sub>D<sub>3</sub>. The optimal serum levels of 25(OH)D<sub>3</sub> are thought to be about 70–100 nM [36] and these levels are similar to those used in our study. 25(OH)D<sub>3</sub> is present in high amount in the gingival crevicular fluid, which is in direct proximity to periodontal ligament and its levels are increased in periodontal disease [14]. Therefore the effect of 25(OH)D<sub>3</sub> on pro-inflammatory cytokine production observed in our study is physiologically relevant. Previous studies show that hPDLs might locally convert vitamin D<sub>3</sub> into 25(OH)D<sub>3</sub> and subsequently into 1,25(OH)<sub>2</sub>D<sub>3</sub> and the expression of enzyme responsible for this conversion is influenced by some pro-inflammatory mediators [20,21]. Thus, on the one hand, the

inflammatory response of periodontal ligament is regulated by both 25(OH)D<sub>3</sub> and 1,25(OH)<sub>2</sub>D<sub>3</sub> and, on the other hand, several factors involved in vitamin D<sub>3</sub> metabolism are also regulated by inflammatory stimuli by feedback mechanisms. Vitamin D<sub>3</sub> is also known to regulate osteogenic differentiation in periodontal ligament cells [37] and thus might affect the neighbouring alveolar bone. Therefore, it is plausible that vitamin D<sub>3</sub> metabolism could play an important role in the regulation of the periodontal tissue homeostasis, especially during inflammation.

The exact physiological role of vitamin D<sub>3</sub> effect on inflammatory response in periodontal ligament remains to be clarified. Decreased production of pro-inflammatory mediators by vitamin D<sub>3</sub> might reduce the ability of immune system to recognize and eliminate pathogenic microorganisms on the one hand, but also could represent a protective mechanism prohibiting local excessive pro-inflammatory response and tissue destruction on the other hand [38]. Noteworthy, the effects of vitamin D<sub>3</sub> in oral cavity are not associated only with decreased inflammatory response. Particularly, a study on human gingival epithelial cells shows that 1,25(OH)<sub>2</sub>D<sub>3</sub> enhance immune response, which could lead to an increase in antibacterial activity against periodontal pathogens [39]. Periodontium is a complex tissue consisting by different cells types, which might participate in the host response to periodontal pathogens [40]. Thus, inflammatory response in various cells



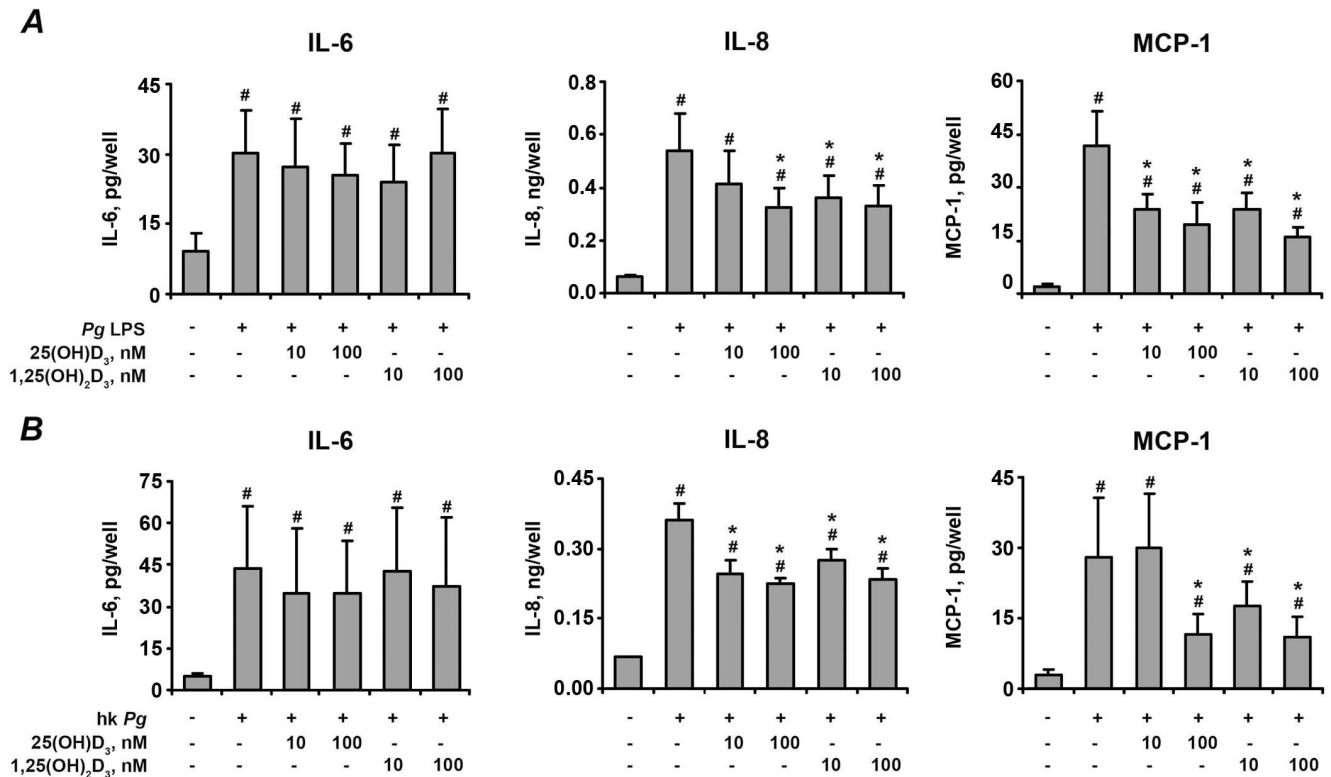

**Figure 10. Effect of 25(OH)D<sub>3</sub> and 1,25(OH)<sub>2</sub>D<sub>3</sub> on the production of pro-inflammatory mediators by primary hPdLC in response to stimulation with *P. gingivalis* LPS or heat-killed *P. gingivalis*.** Cells were stimulated with *P. gingivalis* LPS (Pg LPS, 1 µg/ml) or heat-killed *P. gingivalis* (hk Pg, 10<sup>8</sup> cells/ml) for 24 h in the presence or in the absence of different concentrations of 25(OH)D<sub>3</sub> or 1,25(OH)<sub>2</sub>D<sub>3</sub>. The levels of IL-6 (A), IL-8 (B), and MCP-1 (C) were measured in cell supernatants using ELISA. # means significantly different from control group (non stimulated cells). \* means significantly different from group stimulated with *P. gingivalis* LPS or heat-killed *P. gingivalis* only. doi:10.1371/journal.pone.0090301.g010

could be differently affected by vitamin D<sub>3</sub> and this might influence the balance between bacterial elimination and tissue destruction during progression of periodontal disease. This assumption is made based on the observations of *in vitro* studies and further well-designed *in vivo* animal and/or clinical studies are required to understand the role of vitamin D<sub>3</sub> in periodontitis. Since vitamin D<sub>3</sub> influences inflammatory response in periodontal tissue, it might be considered as a potential tool for periodontal therapy. Some studies show that systemic vitamin D<sub>3</sub> supplementation might have beneficial effect on periodontal health and periodontal therapy outcome [41,42,43]. Our data support the idea suggested by previous study [21], that topical application of vitamin D<sub>3</sub>, particularly 25(OH)D<sub>3</sub>, could be also considered as a potential tool in periodontal therapy.

We found that IL-6 production is inhibited by 25(OH)D<sub>3</sub> and 1,25(OH)<sub>2</sub>D<sub>3</sub> in commercially available hPdLF but not in primary hPdLC. The reasons for this discrepancy between isolated primary hPdLC and commercially available hPdLF are not entirely clear. Interestingly, a previous study on primary hPdLC also shows that biologically active 1,25(OH)<sub>2</sub>D<sub>3</sub> inhibits IL-8 production in response to stimulation with *P. gingivalis*, but has no effect on IL-6 production [22]. One of the possible explanations of this finding could be the methodological difference in the cell isolation protocol. In the present study, similarly to study of Tang et al, primary hPdLC were isolated by tissue outgrow method, whereas commercially available hPdLF were produced by supplier's Clonetics technique. Differences in periodontal ligament cells isolation methods are known to affect some cell properties

[44]. Therefore it is possible that these changes also may lead to the modifications in cellular inflammatory responses observed in the present study. Moreover age and gender of the donor subjects may also contribute to the primary hPdLC properties [45,46].

Our data showed that the action of both 25(OH)D<sub>3</sub> and 1,25(OH)<sub>2</sub>D<sub>3</sub> is mediated by VDR, because the silencing of this protein by specific siRNA resulted in abolishment of the effects of both forms of vitamin D. Therefore, regulation of expression levels of VDR in periodontal ligament cells might be important factor influencing functional properties of periodontal tissue. VDR is known to exhibit large polymorphism, which might contribute to different infectious disease [5,47]. Previous clinical studies link VDR polymorphism to the chronic and aggressive periodontitis [48,49,50]. Therefore, the possibility that VDR polymorphism contributes to the regulation of inflammatory response by vitamin D<sub>3</sub> in periodontal ligament cells cannot be excluded and requires further investigations.

Summarizing, our study shows that vitamin D<sub>3</sub> modulates inflammatory response in periodontal ligament cells through vitamin D<sub>3</sub> receptor. This finding suggests that both 1,25(OH)<sub>2</sub>D<sub>3</sub> and 25(OH)D<sub>3</sub> might affect inflammatory processes in periodontal disease. The exact role of vitamin D<sub>3</sub> pathway in the progression of periodontal disease and possible therapeutic approaches in treatment or prophylaxis of periodontitis needs to be further investigated.

## Acknowledgments

The authors acknowledge the help of Mrs. Phuong Quynh Nguyen and Mrs. Hedwig Rutschek (both Medical University of Vienna) for excellent technical assistance.

## References

- Lips P (2006) Vitamin D physiology. *Prog Biophys Mol Biol* 92: 4–8.
- Jones G (2008) Pharmacokinetics of vitamin D toxicity. *Am J Clin Nutr* 88: 582S–586S.
- Haussler MR, Whitfield GK, Haussler CA, Hsieh JC, Thompson PD, et al. (1998) The nuclear vitamin D receptor: biological and molecular regulatory properties revealed. *J Bone Miner Res* 13: 325–349.
- Zehnder D, Bland R, Williams MC, McNinch RW, Howie AJ, et al. (2001) Extrarenal expression of 25-hydroxyvitamin d(3)-1 alpha-hydroxylase. *J Clin Endocrinol Metab* 86: 888–894.
- White JH (2008) Vitamin D signaling, infectious diseases, and regulation of innate immunity. *Infect Immun* 76: 3837–3843.
- Kinane DF (2001) Causation and pathogenesis of periodontal disease. *Periodontol* 2000 25: 8–20.
- Holt SC, Ebersole JL (2005) *Porphyromonas gingivalis*, *Treponema denticola*, and *Tannerella forsythia*: the “red complex”, a prototype polybacterial pathogenic consortium in periodontitis. *Periodontol* 2000 38: 72–122.
- Genco RJ (1992) Host responses in periodontal diseases: current concepts. *J Periodontol* 63: 338–355.
- Socransky SS, Haffajee AD, Cugini MA, Smith C, Kent RL Jr (1998) Microbial complexes in subgingival plaque. *J Clin Periodontol* 25: 134–144.
- Stein SH, Livada R, Tipton DA (2013) Re-evaluating the role of vitamin D in the periodontium. *J Periodontol Res*.
- Dietrich T, Josphipura KJ, Dawson-Hughes B, Bischoff-Ferrari HA (2004) Association between serum concentrations of 25-hydroxyvitamin D<sub>3</sub> and periodontal disease in the US population. *Am J Clin Nutr* 80: 108–113.
- Dietrich T, Nunn M, Dawson-Hughes B, Bischoff-Ferrari HA (2005) Association between serum concentrations of 25-hydroxyvitamin D and gingival inflammation. *Am J Clin Nutr* 82: 575–580.
- Liu K, Meng H, Tang X, Xu L, Zhang L, et al. (2009) Elevated plasma calcifediol is associated with aggressive periodontitis. *J Periodontol* 80: 1114–1120.
- Liu K, Meng H, Lu R, Xu L, Zhang L, et al. (2010) Initial periodontal therapy reduced systemic and local 25-hydroxy vitamin D(3) and interleukin-1beta in patients with aggressive periodontitis. *J Periodontol* 81: 260–266.
- Beertsen W, McCulloch CA, Sodek J (1997) The periodontal ligament: a unique, multifunctional connective tissue. *Periodontol* 2000 13: 20–40.
- Jonsson D, Nebel D, Bratthall G, Nilsson BO (2011) The human periodontal ligament cell: a fibroblast-like cell acting as an immune cell. *J Periodontol Res* 46: 153–157.
- Pathirana RD, O'Brien-Simpson NM, Reynolds EC (2010) Host immune responses to *Porphyromonas gingivalis* antigens. *Periodontol* 2000 52: 218–237.
- Scheres N, Laine ML, de Vries TJ, Everts V, van Winkelhoff AJ (2010) Gingival and periodontal ligament fibroblasts differ in their inflammatory response to viable *Porphyromonas gingivalis*. *J Periodontol Res* 45: 262–270.
- Scheres N, Laine ML, Sipsos PM, Bosch-Tijhof CJ, Crielaard W, et al. (2011) Periodontal ligament and gingival fibroblasts from periodontitis patients are more active in interaction with *Porphyromonas gingivalis*. *J Periodontol Res* 46: 407–416.
- Liu K, Meng H, Hou J (2012) Activity of 25-hydroxylase in human gingival fibroblasts and periodontal ligament cells. *PLoS ONE* 7: e52053.
- Liu K, Meng H, Hou J (2012) Characterization of the autocrine/paracrine function of vitamin D in human gingival fibroblasts and periodontal ligament cells. *PLoS ONE* 7: e39878.
- Tang X, Pan Y, Zhao Y (2013) Vitamin D inhibits the expression of interleukin-8 in human periodontal ligament cells stimulated with *Porphyromonas gingivalis*. *Arch Oral Biol* 58: 397–407.
- Jacobs C, Grimm S, Ziebart T, Walter C, Wehrbein H (2013) Osteogenic differentiation of periodontal fibroblasts is dependent on the strength of mechanical strain. *Arch Oral Biol* 58: 896–904.
- Jacobs C, Walter C, Ziebart T, Grimm S, Meila D, et al. (2013) Induction of IL-6 and MMP-8 in human periodontal fibroblasts by static tensile strain. *Clin Oral Investig*.
- Kumada Y, Zhang S (2010) Significant type I and type III collagen production from human periodontal ligament fibroblasts in 3D peptide scaffolds without extra growth factors. *PLoS ONE* 5: e10305.
- Andruxhov O, Matejka M, Rausch-Fan X (2010) Effect of cyclosporin A on proliferation and differentiation of human periodontal ligament cells. *Acta Odontol Scand* 68: 329–334.

## Author Contributions

Conceived and designed the experiments: O. Andruxhov O. Andruxhova XR-F. Performed the experiments: O. Andruxhov O. Andruxhova UH YT. Analyzed the data: O. Andruxhov O. Andruxhova UH YT XR-F. Contributed reagents/materials/analysis tools: O. Andruxhov H-PB XR-F. Wrote the paper: O. Andruxhov O. Andruxhova H-PB XR-F.

- Kocogozlu L, Elkaim R, Tenenbaum H, Werner S (2009) Variable cell responses to *P. gingivalis* lipopolysaccharide. *J Dent Res* 88: 741–745.
- Sekot G, Posch G, Messner P, Matejka M, Rausch-Fan X, et al. (2011) Potential of the *Tannerella forsythia* S-layer to delay the immune response. *J Dent Res* 90: 109–114.
- Andruxhov O, Ertlschweiger S, Moritz A, Bantleon HP, Rausch-Fan X (2013) Different effects of *P. gingivalis* LPS and *E. coli* LPS on the expression of interleukin-6 in human gingival fibroblasts. *Acta Odontol Scand*.
- Van Peer G, Mestdagh P, Vandesompele J (2012) Accurate RT-qPCR gene expression analysis on cell culture lysates. *Sci Rep* 2: 222.
- Romero-Calvo I, Ocon B, Martínez-Moya P, Suarez MD, Zarzuelo A, et al. (2010) Reversible Ponceau staining as a loading control alternative to actin in Western blots. *Anal Biochem* 401: 318–320.
- Fonseca JE, Santos MJ, Canhao H, Choy E (2009) Interleukin-6 as a key player in systemic inflammation and joint destruction. *Autoimmun Rev* 8: 538–542.
- Ishimi Y, Miyaura C, Jin CH, Akatsu T, Abe E, et al. (1990) IL-6 is produced by osteoblasts and induces bone resorption. *J Immunol* 145: 3297–3303.
- Baggiolini M, Dewald B, Moser B (1994) Interleukin-8 and related chemotactic cytokines—CXC and CC chemokines. *Adv Immunol* 55: 97–179.
- Silva TA, Garlet GP, Fukada SY, Silva JS, Cunha FQ (2007) Chemokines in oral inflammatory diseases: apical periodontitis and periodontal disease. *J Dent Res* 86: 306–319.
- Bischoff-Ferrari HA, Giovannucci E, Willett WC, Dietrich T, Dawson-Hughes B (2006) Estimation of optimal serum concentrations of 25-hydroxyvitamin D for multiple health outcomes. *Am J Clin Nutr* 84: 18–28.
- Tang X, Meng H (2009) Osteogenic induction and 1,25-dihydroxyvitamin D<sub>3</sub> oppositely regulate the proliferation and expression of RANKL and the vitamin D receptor of human periodontal ligament cells. *Arch Oral Biol* 54: 625–633.
- Teng YT (2006) Protective and destructive immunity in the periodontium: Part I—innate and humoral immunity and the periodontium. *J Dent Res* 85: 198–208.
- McMahon L, Schwartz K, Yilmaz O, Brown E, Ryan LK, et al. (2011) Vitamin D-mediated induction of innate immunity in gingival epithelial cells. *Infect Immun* 79: 2250–2256.
- Dixon DR, Bainbridge BW, Darveau RP (2004) Modulation of the innate immune response within the periodontium. *Periodontol* 2000 35: 53–74.
- Bashutski JD, Eber RM, Kinney JS, Benavides E, Maitra S, et al. (2011) The impact of vitamin D status on periodontal surgery outcomes. *J Dent Res* 90: 1007–1012.
- Garcia MN, Hildebolt CF, Miley DD, Dixon DA, Couture RA, et al. (2011) One-year effects of vitamin D and calcium supplementation on chronic periodontitis. *J Periodontol* 82: 25–32.
- Miley DD, Garcia MN, Hildebolt CF, Shannon WD, Couture RA, et al. (2009) Cross-sectional study of vitamin D and calcium supplementation effects on chronic periodontitis. *J Periodontol* 80: 1433–1439.
- Tanaka K, Iwasaki K, Feghali KE, Komaki M, Ishikawa I, et al. (2011) Comparison of characteristics of periodontal ligament cells obtained from outgrowth and enzyme-digested culture methods. *Arch Oral Biol* 56: 380–388.
- Shu L, Guan SM, Fu SM, Guo T, Cao M, et al. (2008) Estrogen modulates cytokine expression in human periodontal ligament cells. *J Dent Res* 87: 142–147.
- Krieger E, Hornikel S, Wehrbein H (2013) Age-related changes of fibroblast density in the human periodontal ligament. *Head Face Med* 9: 22.
- Uitterlinden AG, Fang Y, Van Meurs JB, Pols HA, Van Leeuwen JP (2004) Genetics and biology of vitamin D receptor polymorphisms. *Gene* 338: 143–156.
- Martelli FS, Mengoni A, Martelli M, Rosati C, Fanti E (2011) VDR TaqI polymorphism is associated with chronic periodontitis in Italian population. *Arch Oral Biol* 56: 1494–1498.
- Brett PM, Zygogianni P, Griffiths GS, Tomaz M, Parkar M, et al. (2005) Functional gene polymorphisms in aggressive and chronic periodontitis. *J Dent Res* 84: 1149–1153.
- Tanaka K, Miyake Y, Hanioka T, Arakawa M (2013) VDR gene polymorphisms, interaction with smoking and risk of periodontal disease in Japanese women: the Kyushu Okinawa maternal and child health study. *Scand J Immunol* 78: 371–377.
